# Supplementary material for: MICOP: Maximal information coefficient-based oscillation prediction to detect biological rhythms in proteomics data
Source: PubMed Central journal article supplement (PMC6025708; doi:10.1186/s12859-018-2257-4), 2018-06-28

Sampling interval (hours)

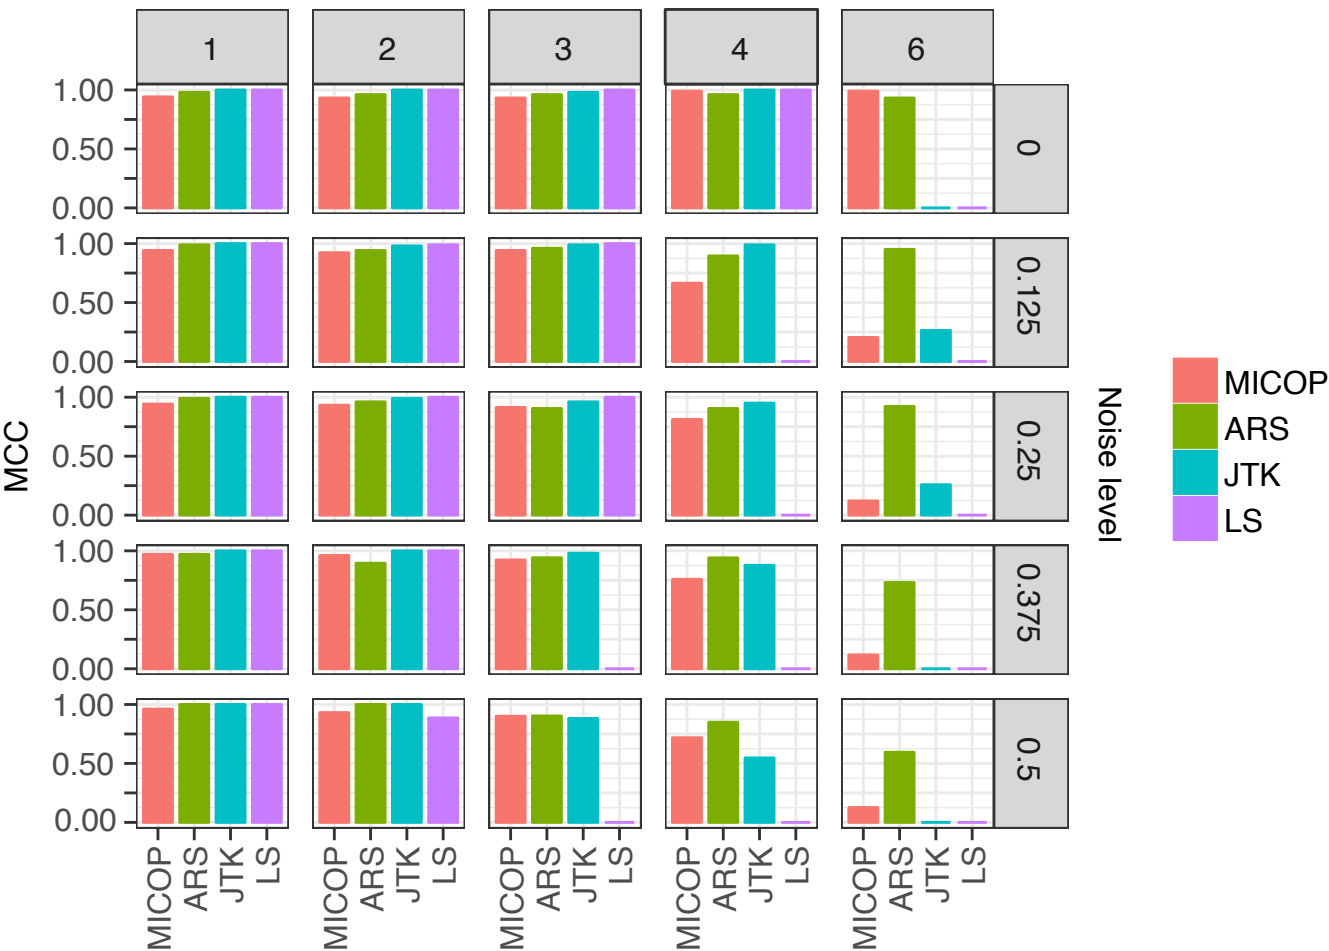

Supplement: 12859_2018_2257_MOESM2_ESM.pdf [file 12859_2018_2257_MOESM2_ESM.pdf]
